# Supplementary material for: Pharmacological mTOR targeting enhances the antineoplastic effects of selective PI3Kα inhibition in medulloblastoma
Source: PubMed Central journal article supplement (PMC6731286; doi:10.1038/s41598-019-49299-3), 2019-09-06

# Pharmacological mTOR targeting enhances the antineoplastic effects of selective PI3K $\alpha$ inhibition in medulloblastoma

Frank Eckerdt<sup>1,2,§,\*</sup>, Jessica Clymer<sup>1,3,§,¶</sup>, Jonathan B. Bell<sup>1</sup>, Elspeth M. Beauchamp<sup>1,4,5</sup>, Gavin T. Blyth<sup>1</sup>, Stewart Goldman<sup>1,3</sup>, and Leonidas C. Platanias<sup>1,4,5</sup>

<sup>1</sup>Robert H. Lurie Comprehensive Cancer Center of Northwestern University, Chicago, IL, USA

<sup>2</sup>Department of Neurological Surgery, Feinberg School of Medicine, Northwestern University, Chicago, IL, USA

<sup>3</sup>Division of Hematology/Oncology/Neuro Oncology/Stem Cell Transplantation, Department of Pediatrics, Ann & Robert H. Lurie Children's Hospital of Chicago, Chicago, IL, USA

<sup>4</sup>Division of Hematology/Oncology, Department of Medicine, Feinberg School of Medicine, Northwestern University, Chicago, IL, USA

<sup>5</sup>Medicine Service, Jesse Brown VA Medical Center, Chicago, IL, USA

<sup>§</sup>Both authors contributed equally

<sup>¶</sup>Current address: Dana-Farber/Boston Children's Cancer and Blood Disorders Center, Boston, MA, USA

\*Correspondence to: Frank Eckerdt, Robert H. Lurie Comprehensive Cancer Center, 303 East Superior Street, Lurie 3-220, Chicago, IL 60611, Tel. 312-503-0292; Email: [frank.eckerdt@northwestern.edu](mailto:frank.eckerdt@northwestern.edu)

Supplemental Table 1

| <b>ANTIBODY</b>                           | <b>SOURCE</b>             | <b>IDENTIFIER</b>                |
|-------------------------------------------|---------------------------|----------------------------------|
| p70S6K (49D7)                             | Cell Signaling Technology | Cat#:2708<br>RRID:AB_390722      |
| p-p70S6K T389                             | Cell Signaling Technology | Cat#:9205<br>RRID:AB_330944      |
| Lamin A/C                                 | Cell Signaling Technology | Cat#:2032<br>RRID:AB_2136278     |
| Beta-tubulin (D3U1W)                      | Cell Signaling Technology | Cat#:86298<br>RRID:AB_2715541    |
| Alpha-tubulin (B-7)                       | Santa Cruz Biotechnology  | Cat#:sc-5286<br>RRID:AB_628411   |
| HSP-90 (H-114)                            | Santa Cruz Biotechnology  | Cat#:sc-7947<br>RRID:AB_2121235  |
| PI3 Kinase p110alpha (c73F8)              | Cell Signaling Technology | Cat# 4249<br>RRID: AB_2165248    |
| GAPDH                                     | Millipore                 | Cat# MAB374,<br>RRID:AB_2107445  |
| Pan AKT (40D4)                            | Cell Signaling Technology | Cat# 2920<br>RRID:AB_1147620     |
| p-AKT S473 (D9E)                          | Cell Signaling Technology | Cat# 4060<br>RRID:AB_2315049     |
| 4EBP1                                     | Cell Signaling Technology | Cat# 9452<br>RRID:AB_331692      |
| p-4EBP1 T37/46                            | Cell Signaling Technology | Cat# 9459<br>RRID: AB_330985     |
| GLI1                                      | Cell Signaling Technology | Cat# 3538<br>RRID:AB_1903989     |
| HDAC1 (10E2)                              | Cell Signaling Technology | Cat# 5356<br>RRID:AB_10612242    |
| Rabbit IgG HRP Linked Whole Ab            | GE Healthcare             | NA934-1ML<br>RRID:AB_772206      |
| Goat Anti-Mouse IgG (H + L)-HRP Conjugate | Biorad                    | Cat#:1706516<br>RRID:AB_11125547 |

Supp Table 1: List of antibodies used in this study, their manufacturers, catalog numbers and Research Resource Identifier (RRID) numbers.

Figure 1A and B full blots (films)

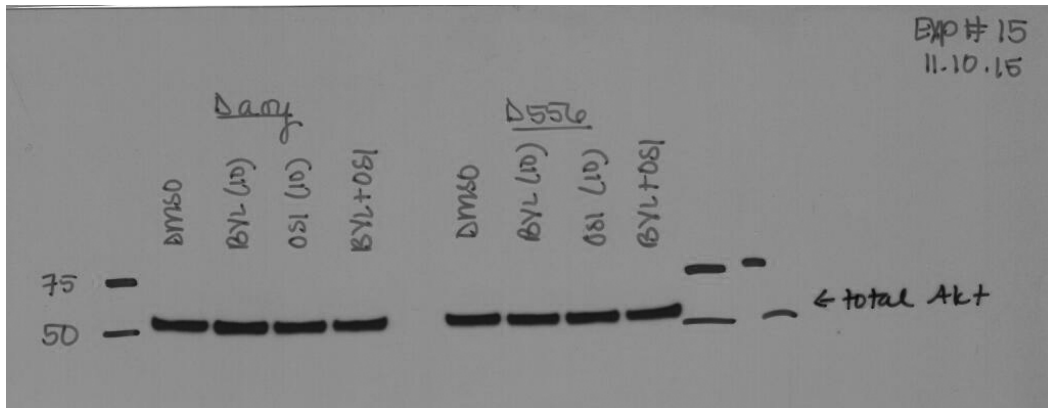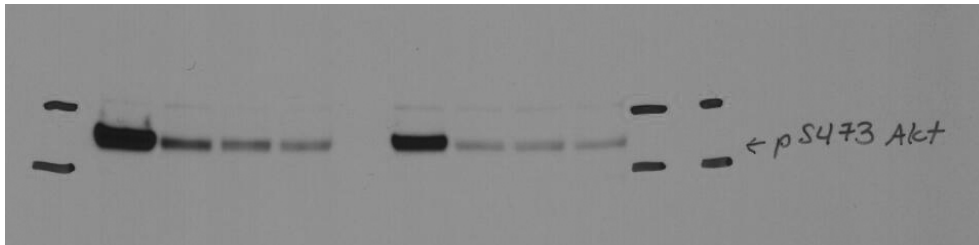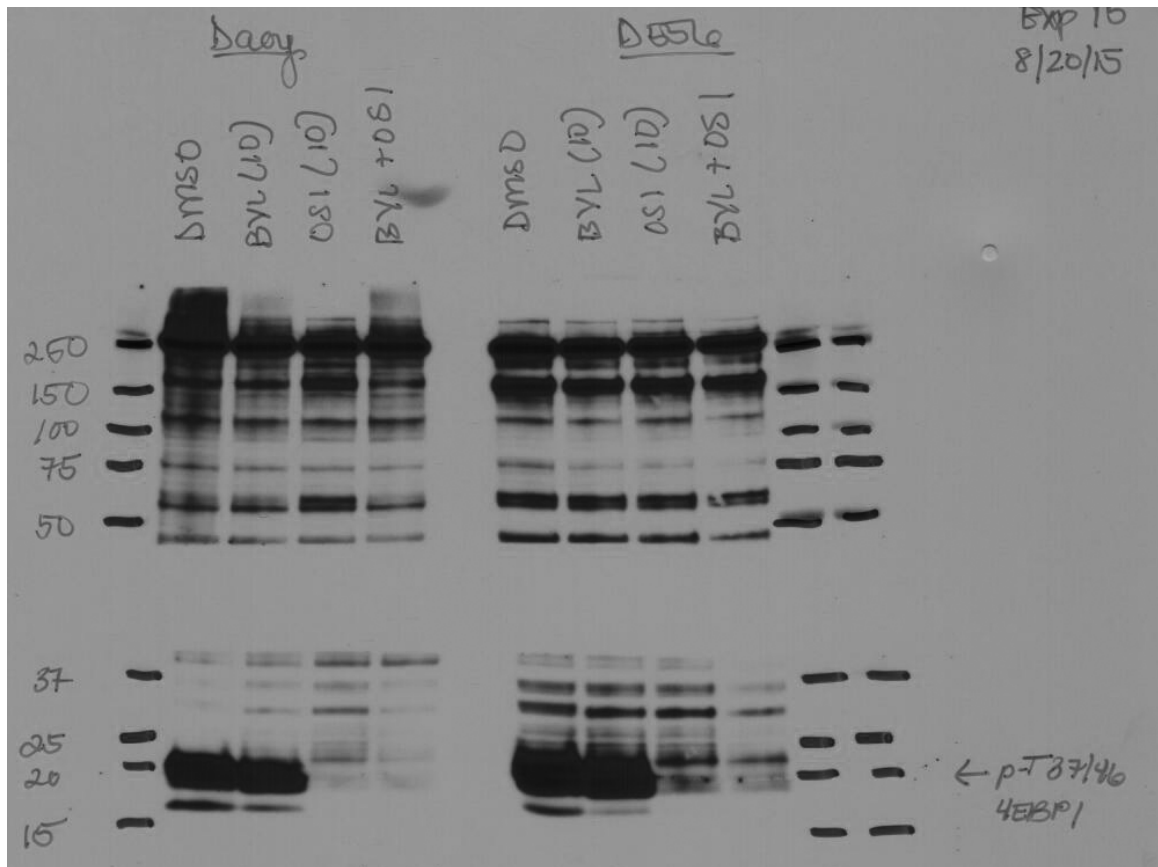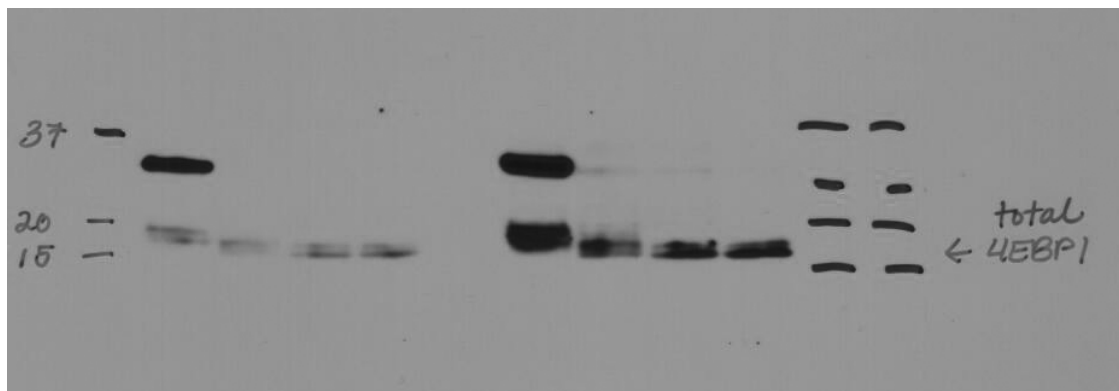

Figure 1A and B full blots (films)

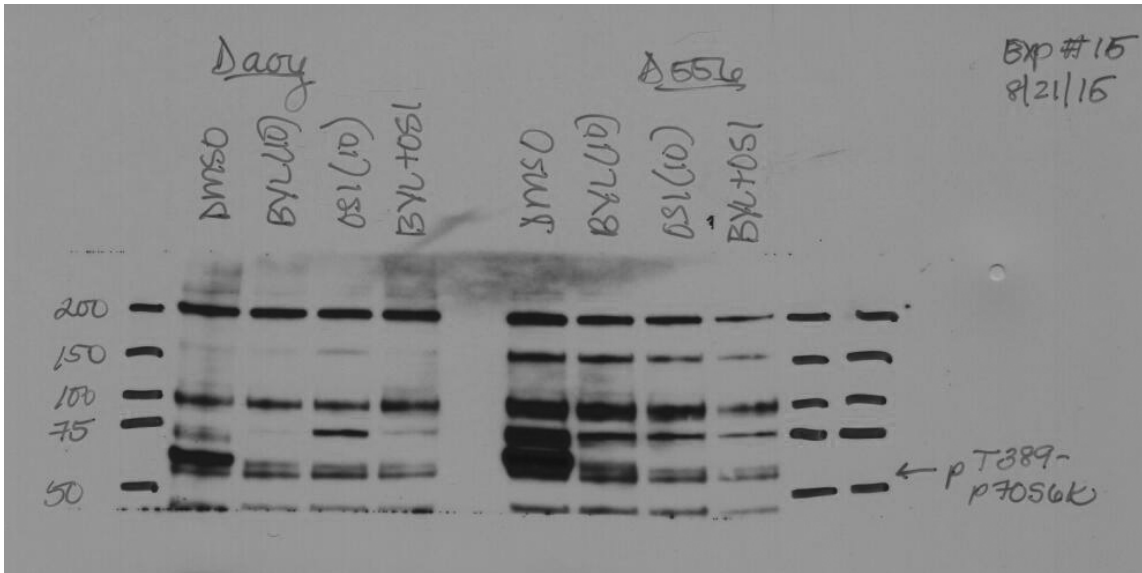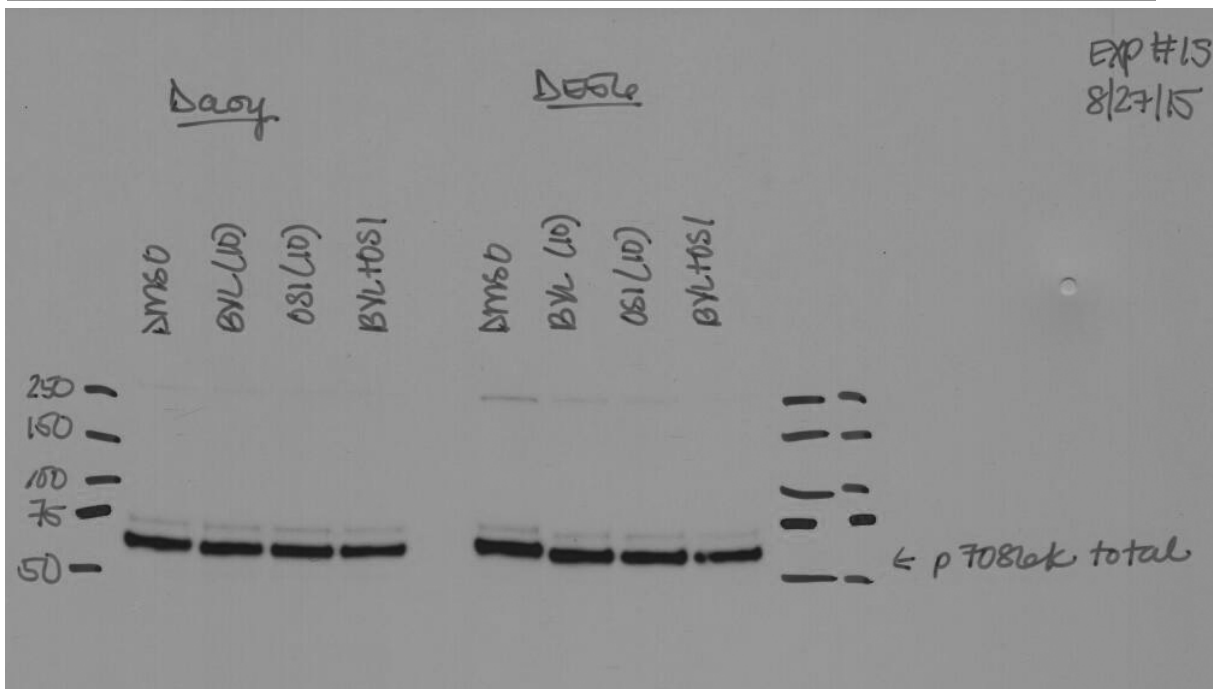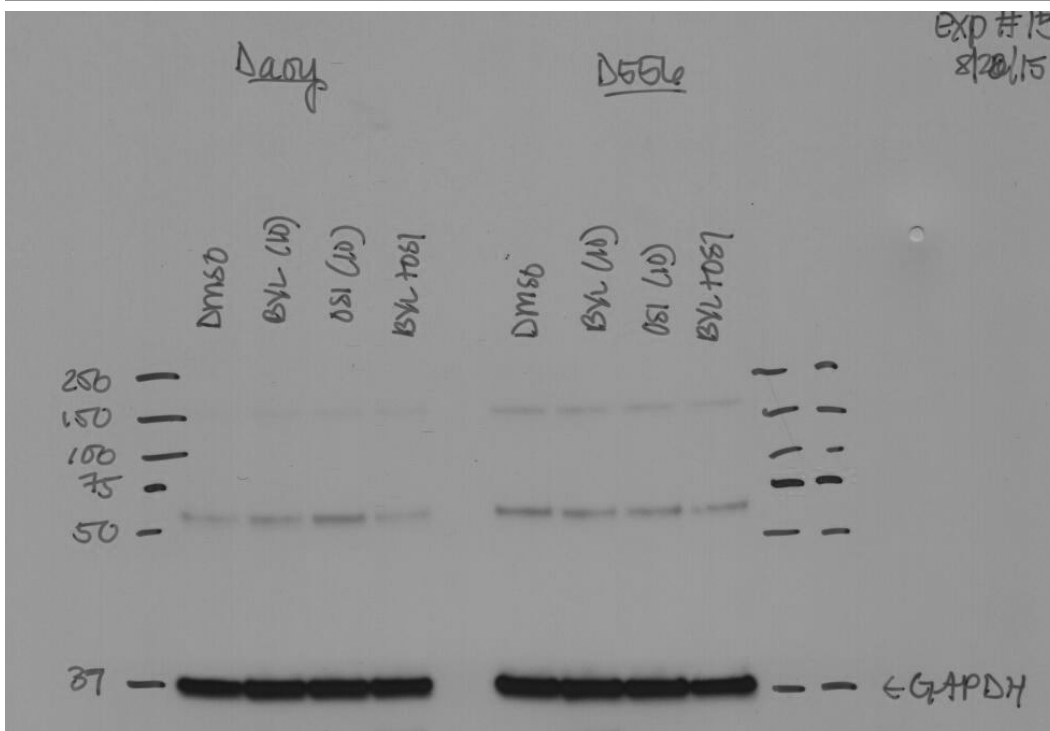

# Figure 3A full blots (Biorad Chemidoc)

11.3 sec exposure

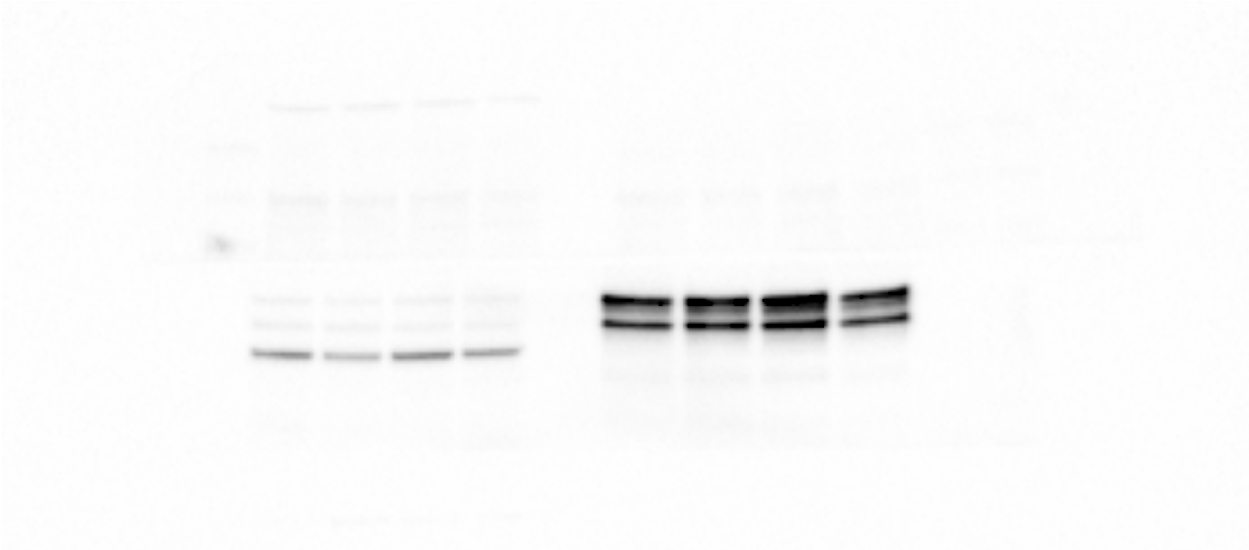

GLI1

LaminA/C  
and tubulin

289.7 sec exposure

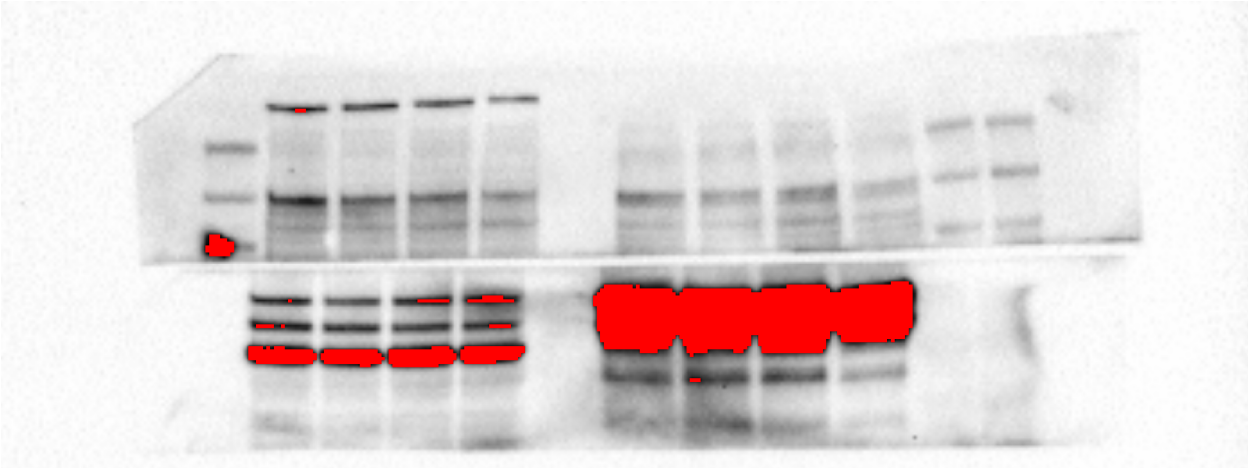

GLI1

LaminA/C  
and tubulin

# Figure 3B full blots (Biorad Chemidoc)

5.1 sec exposure

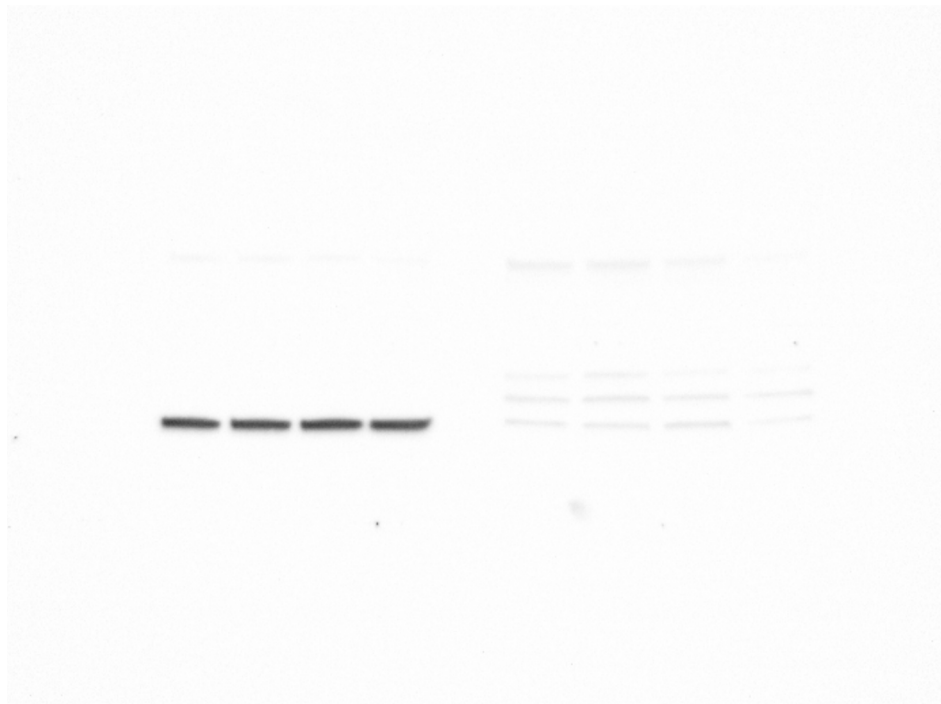

GLI1

LaminA/C  
and tubulin

120.0 sec exposure

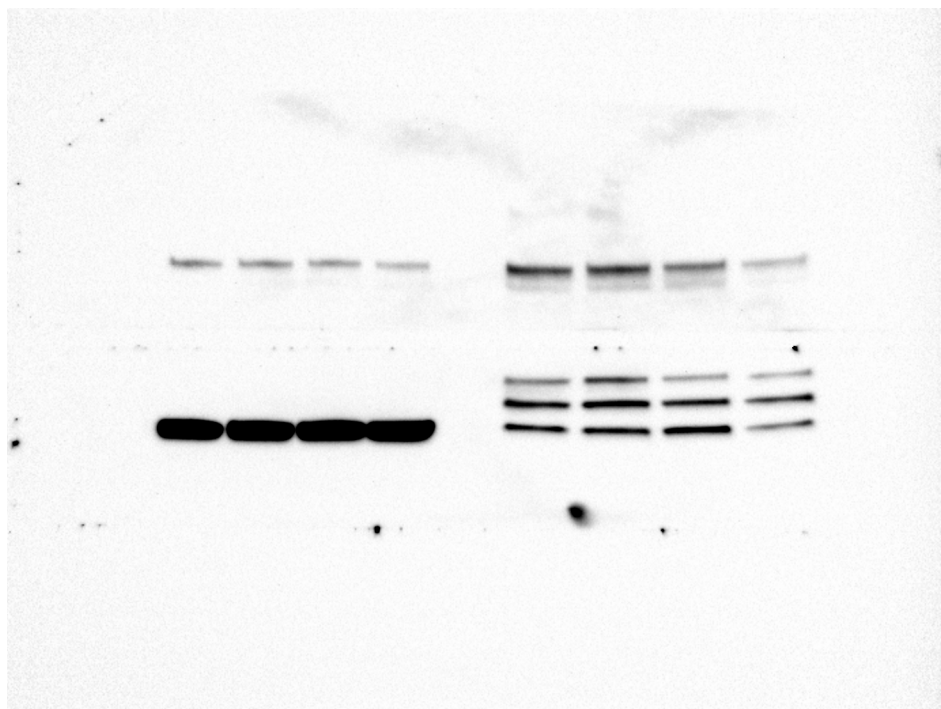

GLI1

LaminA/C  
and tubulin

# Figure 3C full blots (Biorad Chemidoc)

120.0 sec exposure

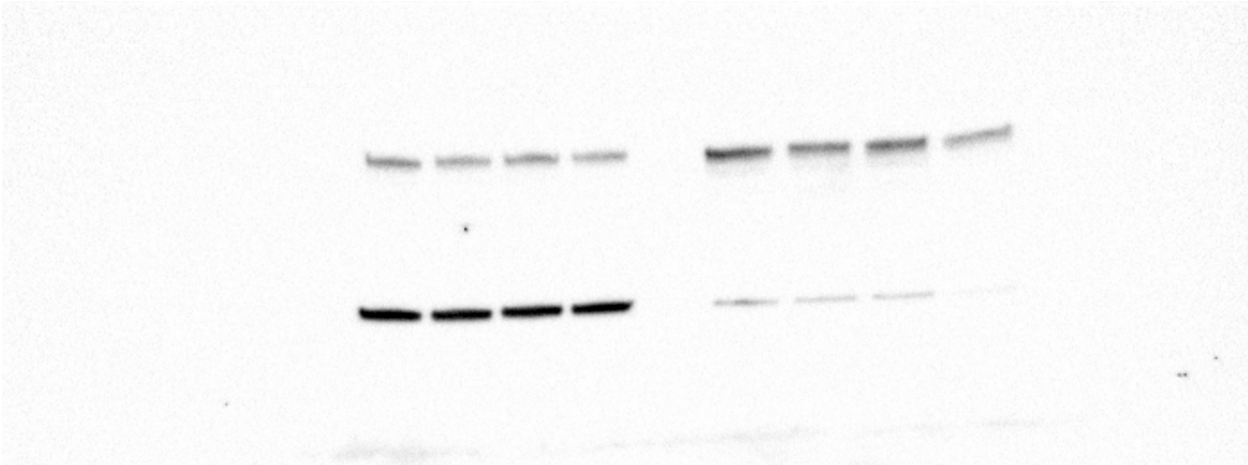

GLI1

tubulin

120.0 sec exposure

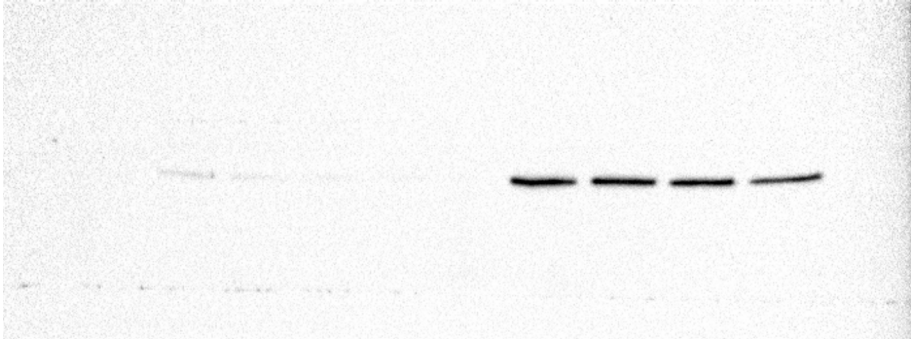

HDAC1

Figure 4G and H full blots (films).

Other p110 isoform siRNAs were cropped out because a similar experiment has been published in our previous study (ref. 26).

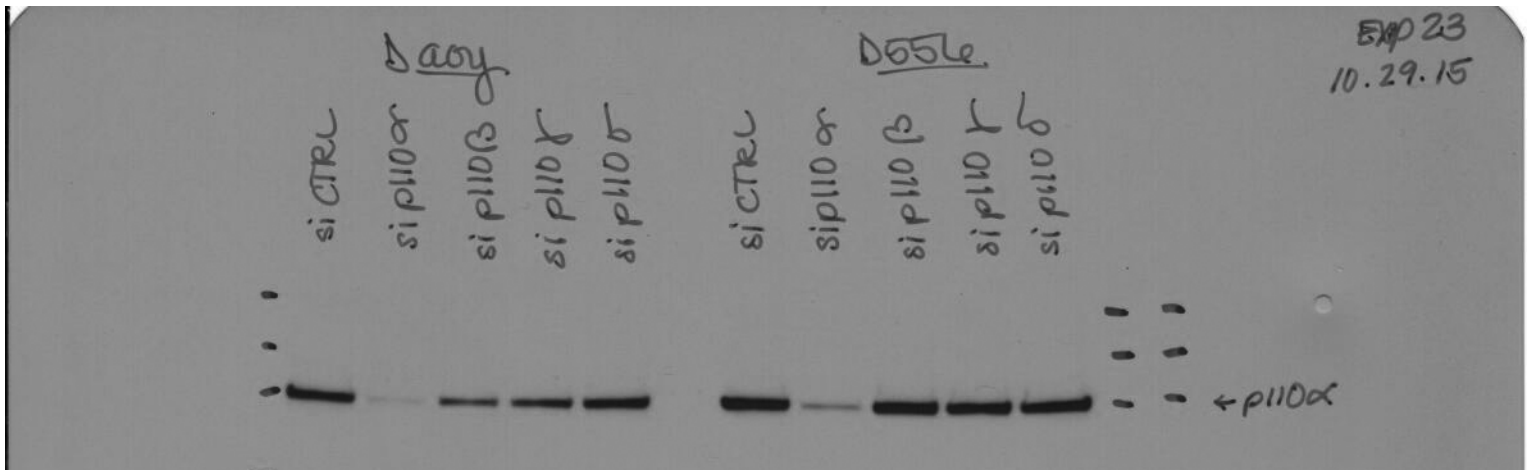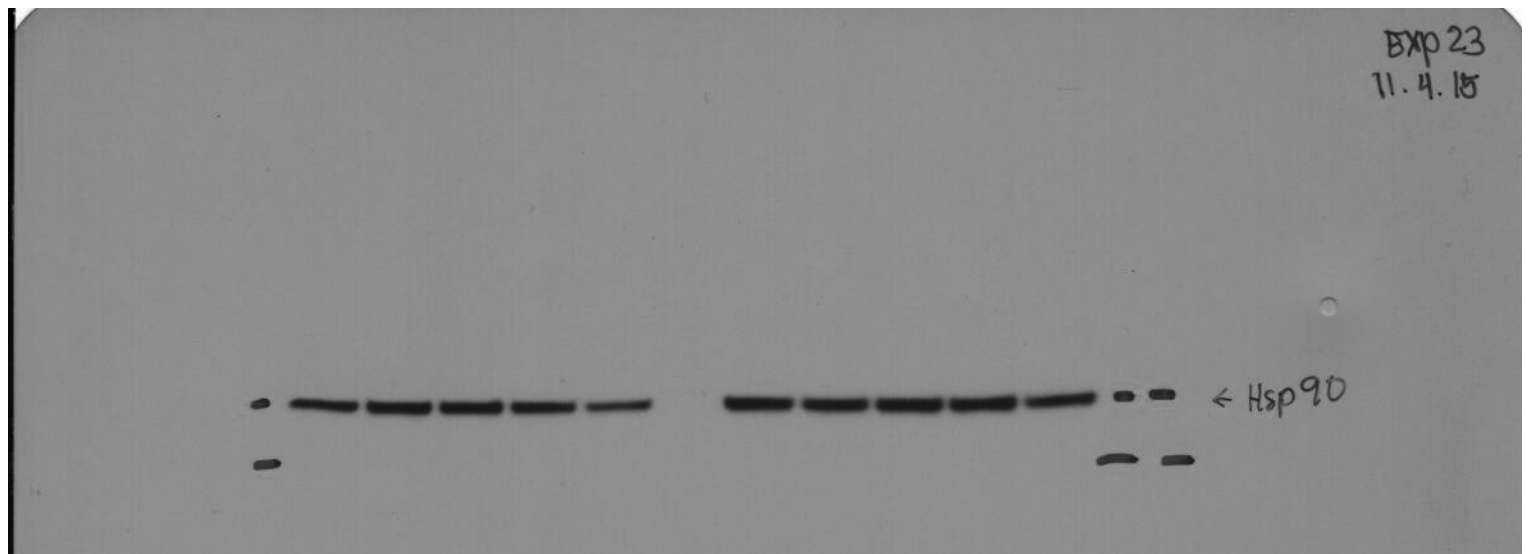

Supplement: 41598_2019_49299_MOESM1_ESM.pdf [file 41598_2019_49299_MOESM1_ESM.pdf]
